# Supplementary material for: Serum acylcarnitines and amino acids and risk of type 2 diabetes in a multiethnic Asian population
Source: PubMed Central journal article supplement — BMJ Open Diabetes Res Care. 2020 Oct 1;8(1):e001315. doi: 10.1136/bmjdrc-2020-001315 (PMC7534670; doi:10.1136/bmjdrc-2020-001315), 2020-10-01

**Supplementary Table 1** Quality control metrics (CV% and missing rate) for each metabolite.

| Metabolite                     | CV%                        | Missing rate (%) |
|--------------------------------|----------------------------|------------------|
| Acylcarnitines                 | C2                         | 3.83             |
|                                | C3                         | 6.37             |
|                                | C4                         | 7.50             |
|                                | C4-DC                      | 8.20             |
|                                | C4-OH <sup>1</sup>         | 20.20            |
|                                | C5 <sup>1</sup>            | 10.72            |
|                                | C5:1                       | 11.80            |
|                                | C5-DC                      | 6.85             |
|                                | C5-OH/C3-DC                | 8.19             |
|                                | C6                         | 6.71             |
|                                | C7-DC                      | 8.17             |
|                                | C8                         | 10.36            |
|                                | C8:1                       | 11.95            |
|                                | C8:1-DC <sup>1</sup>       | 16.41            |
|                                | C8:1-OH/C6-DC <sup>1</sup> | 17.00            |
|                                | C8-DC                      | 12.19            |
|                                | C8-OH/C6-DC                | 10.77            |
|                                | C10                        | 7.90             |
|                                | C10:1                      | 11.22            |
|                                | C10:2                      | 16.52            |
|                                | C10:3                      | 13.35            |
|                                | C12                        | 10.17            |
|                                | C12:1                      | 9.28             |
|                                | C12-OH/C10-DC <sup>1</sup> | 80.39            |
|                                | C14                        | 10.58            |
|                                | C14:1                      | 10.29            |
|                                | C14:1-OH                   | 14.14            |
|                                | C14:2                      | 11.55            |
|                                | C14-OH/C12-DC              | 16.05            |
|                                | C16                        | 5.99             |
|                                | C16:1                      | 9.80             |
|                                | C16:1-OH/C14:1-DC          | 17.84            |
|                                | C16:2                      | 17.30            |
| C16-OH                         | 18.58                      |                  |
| C18                            | 8.59                       |                  |
| C18:1                          | 5.72                       |                  |
| C18:1-DC                       | 17.21                      |                  |
| C18:1-OH/C16:1-DC <sup>1</sup> | 21.44                      |                  |
| C18:2                          | 7.02                       |                  |
| C18:2-OH                       | 18.92                      |                  |
| C18-DC/C20-OH                  | 16.96                      |                  |
| C18-OH/C16-DC <sup>1</sup>     | 22.76                      |                  |
| C20                            | 19.45                      |                  |
| C20:4                          | 16.43                      |                  |
| C22 <sup>1</sup>               | 29.85                      |                  |
| Amino acids                    | Alanine                    | 4.23             |
|                                | Arginine                   | 7.54             |
|                                | Citrulline                 | 8.64             |
|                                | Glutamate/Glutamine        | 6.04             |
|                                | Glycine                    | 5.06             |
|                                | Histidine                  | 5.33             |
|                                | Isoleucine/Leucine         | 4.74             |
|                                | Methionine                 | 7.24             |
|                                | Ornithine                  | 6.79             |
|                                | Phenylalanine              | 4.48             |
|                                | Proline                    | 5.17             |
|                                | Serine                     | 4.50             |
|                                | Tyrosine                   | 5.61             |
| Valine                         | 3.95                       |                  |

<sup>1</sup> Metabolites subsequently removed from analysis during quality control.

**Supplementary Table 2** Full panel of metabolites measured for this study and summary of functional groups.

|                                  | Abbreviation                                                                     | Biochemical name                                               | Functional group                  |                             |
|----------------------------------|----------------------------------------------------------------------------------|----------------------------------------------------------------|-----------------------------------|-----------------------------|
| Acylcarnitines                   | C2                                                                               | Acetylcarnitine                                                | short chain acylcarnitines        |                             |
|                                  | C3                                                                               | Propionylcarnitine                                             |                                   |                             |
|                                  | C4 <sup>1</sup>                                                                  | Butyrylcarnitine/Isobutyrylcarnitine <sup>1</sup>              |                                   |                             |
|                                  | C4-DC                                                                            | Succinylcarnitine                                              |                                   |                             |
|                                  | C4-OH <sup>2</sup>                                                               | 3-Hydroxybutyrylcarnitine/Hydroxybutyrylcarnitine <sup>2</sup> |                                   |                             |
|                                  | C5 <sup>2</sup>                                                                  | Isovalerylcarnitine <sup>2</sup>                               |                                   |                             |
|                                  | C5:1                                                                             | Tiglylcarnitine                                                |                                   |                             |
|                                  | C5-DC                                                                            | Glutaryl carnitine                                             |                                   |                             |
|                                  | C5-OH/C3-DC <sup>1</sup>                                                         | 3-Hydroxyvalerylcarnitine/Malonylcarnitine <sup>1</sup>        |                                   |                             |
|                                  | C6                                                                               | Hexanoylcarnitine                                              |                                   |                             |
|                                  | C7-DC                                                                            | Pimelylcarnitine                                               |                                   |                             |
|                                  | C8                                                                               | Octanoylcarnitine                                              |                                   |                             |
|                                  | C8:1                                                                             | Octenoylcarnitine                                              |                                   |                             |
|                                  | C8:1-DC <sup>2</sup>                                                             | Octenedioylcarnitine <sup>2</sup>                              |                                   |                             |
|                                  | C8:1-OH/C6-DC <sup>1,2</sup>                                                     | 3-Hydroxyoctenoylcarnitine/Adipoylcarnitine <sup>1,2</sup>     |                                   |                             |
|                                  | C8-DC                                                                            | Suberylcarnitine                                               |                                   |                             |
|                                  | C8-OH/C6-DC <sup>1</sup>                                                         | 3-Hydroxyoctanoylcarnitine/Adipoylcarnitine <sup>1</sup>       |                                   |                             |
|                                  | C10                                                                              | Decanoylcarnitine                                              |                                   | medium chain acylcarnitines |
|                                  | C10:1                                                                            | Decenoylcarnitine                                              |                                   |                             |
|                                  | C10:2                                                                            | Decadienoylcarnitine                                           |                                   |                             |
|                                  | C10:3                                                                            | Decatrienoylcarnitine                                          |                                   |                             |
|                                  | C12                                                                              | Dodecanoylcarnitine                                            |                                   |                             |
|                                  | C12:1                                                                            | Dodecenoylcarnitine                                            |                                   |                             |
| C12-OH/C10-DC <sup>1,2</sup>     | 3-Hydroxydodecanoylcarnitine/Sebacoylcarnitine <sup>1,2</sup>                    |                                                                |                                   |                             |
| C14                              | Tetradecanoylcarnitine                                                           |                                                                |                                   |                             |
| C14:1                            | Tetradecenoylcarnitine                                                           |                                                                |                                   |                             |
| C14:1-OH                         | Hydroxytetradecenoylcarnitine                                                    |                                                                |                                   |                             |
| C14:2                            | Tetradecadienoylcarnitine                                                        |                                                                |                                   |                             |
| C14-OH/C12-DC <sup>1</sup>       | 3-Hydroxytetradecanoylcarnitine/Dodecanedioylcarnitine <sup>1</sup>              |                                                                |                                   |                             |
| C16                              | Hexadecanoylcarnitine                                                            | long chain acylcarnitines                                      |                                   |                             |
| C16:1                            | Hexadecenoylcarnitine                                                            |                                                                |                                   |                             |
| C16:1-OH/C14:1-DC <sup>1</sup>   | 3-Hydroxyhexadecenoylcarnitine/Tetradecenedioylcarnitine <sup>1</sup>            |                                                                |                                   |                             |
| C16:2                            | Hexadecadienoylcarnitine                                                         |                                                                |                                   |                             |
| C16-OH                           | 3-Hydroxyhexadecanoylcarnitine                                                   |                                                                |                                   |                             |
| C18                              | Octadecanoylcarnitine                                                            |                                                                |                                   |                             |
| C18:1                            | Octadecenoylcarnitine                                                            |                                                                |                                   |                             |
| C18:1-DC                         | Octadecenoylcarnitine-dicarboxylic                                               |                                                                |                                   |                             |
| C18:1-OH/C16:1-DC <sup>1,2</sup> | 3-Hydroxyoctadecenoylcarnitine/Hexadecenedioylcarnitine <sup>1,2</sup>           |                                                                |                                   |                             |
| C18:2                            | Octadecadienoylcarnitine                                                         |                                                                |                                   |                             |
| C18:2-OH                         | 3-Hydroxyoctadecadienoylcarnitine                                                |                                                                |                                   |                             |
| C18-DC/C20-OH <sup>1</sup>       | Octadecanoylcarnitine-dicarboxylic/3-Hydroxyarachidoylcarnitine <sup>1</sup>     |                                                                |                                   |                             |
| C18-OH/C16-DC <sup>1,2</sup>     | 3-Hydroxyoctadecanoylcarnitine/Hexadecanoylcarnitine-dicarboxylic <sup>1,2</sup> |                                                                |                                   |                             |
| C20                              | Arachidoylcarnitine                                                              |                                                                |                                   |                             |
| C20:4                            | Arachidonoylcarnitine                                                            |                                                                |                                   |                             |
| C22 <sup>1</sup>                 | Docosanoylcarnitine <sup>1</sup>                                                 |                                                                |                                   |                             |
| Amino acids                      | Phe                                                                              | Phenylalanine                                                  | aromatic amino acids <sup>3</sup> |                             |
|                                  | Tyr                                                                              | Tyrosine                                                       | branched-chain amino acids        |                             |
|                                  | Ile/Leu <sup>1</sup>                                                             | Isoleucine/Leucine <sup>1</sup>                                |                                   |                             |
|                                  | Val                                                                              | Valine                                                         | none                              |                             |
|                                  | Ala                                                                              | Alanine                                                        |                                   |                             |
|                                  | Arg                                                                              | Arginine                                                       |                                   |                             |
|                                  | Cit                                                                              | Citrulline                                                     |                                   |                             |
|                                  | Glu/Gln <sup>1</sup>                                                             | Glutamate/Glutamine <sup>1</sup>                               |                                   |                             |
|                                  | Gly                                                                              | Glycine                                                        |                                   |                             |
|                                  | His                                                                              | Histidine                                                      |                                   |                             |
|                                  | Met                                                                              | Methionine                                                     |                                   |                             |
|                                  | Orn                                                                              | Ornithine                                                      |                                   |                             |
|                                  | Pro                                                                              | Proline                                                        |                                   |                             |
|                                  | Ser                                                                              | Serine                                                         |                                   |                             |
| (Ile/Leu + Val):(Tyr + Phe)      | Fischer ratio                                                                    |                                                                |                                   |                             |
| Ala:Gly                          | Alanine-Glycine ratio                                                            |                                                                |                                   |                             |

<sup>1</sup> Metabolites measured in aggregate.<sup>2</sup> Metabolites subsequently removed from analysis during quality control.<sup>3</sup> Aromatic amino acids also include tryptophan, which was not measured in this analysis.

**Supplementary Table 3** Diagnostic and quality control metrics for the analysis of blood samples.**Location:** National University Hospital**Measurement platform:** ADVIA 2400 (Siemens Healthcare Laboratory Diagnostic, USA)

| Measurement                          | Method                           | Within-day CV% | Between-day CV% |
|--------------------------------------|----------------------------------|----------------|-----------------|
| Fasting plasma glucose               | Glucose oxidase                  | < 0.76         | < 5.68          |
| Serum triglycerides                  | GPO, Trinder without serum blank | < 0.95         | < 1.30          |
| High-density lipoprotein cholesterol | Elimination/catalase             | < 5.78         | < 4.14          |
| Fasting insulin                      | Microparticle enzyme immunoassay | < 4.00         | < 6.29          |

**Location:** Singapore General Hospital**Measurement platform:** Unicel DxC 800 (Beckman Coulter, USA)

| Measurement                          | Method                            | Within-day CV% | Between-day CV% |
|--------------------------------------|-----------------------------------|----------------|-----------------|
| Fasting plasma glucose               | Oxygen rate                       | < 1.70         | < 3.30          |
| Serum triglycerides                  | Spectrophotometry, timed-endpoint | < 0.90         | < 2.10          |
| High-density lipoprotein cholesterol | Spectrophotometry, timed-endpoint | < 1.80         | < 2.50          |
| Fasting insulin                      | Immunoenzymatic (Sandwich) assay  | < 5.10         | < 6.40          |

**Supplementary Table 4** Unadjusted associations between metabolites and incident diabetes. Significant associations following multiple testing are in bold.

| Acylcarnitines    | HR <sup>1</sup> (95% CI)    | P-value           | P-value <sup>2</sup> | Amino acids    | HR (95% CI)                 | P-value           | P-value <sup>2</sup> |
|-------------------|-----------------------------|-------------------|----------------------|----------------|-----------------------------|-------------------|----------------------|
| C2                | <b>1.134 (1.020, 1.260)</b> | <b>0.019</b>      | <b>0.038</b>         | Ala            | <b>1.418 (1.278, 1.572)</b> | <b>&lt; 0.001</b> | <b>&lt; 0.001</b>    |
| C3                | <b>1.128 (1.016, 1.251)</b> | <b>0.023</b>      | <b>0.043</b>         | Arg            | 0.922 (0.823, 1.033)        | 0.163             | 0.220                |
| C4                | <b>1.228 (1.117, 1.350)</b> | <b>&lt; 0.001</b> | <b>&lt; 0.001</b>    | Cit            | 1.109 (0.997, 1.234)        | 0.057             | 0.100                |
| C4-DC             | <b>1.252 (1.131, 1.385)</b> | <b>&lt; 0.001</b> | <b>&lt; 0.001</b>    | Glu/Gln        | <b>1.423 (1.291, 1.569)</b> | <b>&lt; 0.001</b> | <b>&lt; 0.001</b>    |
| C5:1              | <b>1.158 (1.043, 1.286)</b> | <b>0.006</b>      | <b>0.017</b>         | Gly            | <b>0.733 (0.643, 0.836)</b> | <b>&lt; 0.001</b> | <b>&lt; 0.001</b>    |
| C5-DC             | <b>1.132 (1.022, 1.253)</b> | <b>0.017</b>      | <b>0.037</b>         | His            | 0.924 (0.823, 1.037)        | 0.178             | 0.224                |
| C5-OH/C3-DC       | 1.103 (0.991, 1.229)        | 0.074             | 0.123                | Ile/Leu        | <b>1.368 (1.237, 1.513)</b> | <b>&lt; 0.001</b> | <b>&lt; 0.001</b>    |
| C6                | 1.076 (0.969, 1.196)        | 0.172             | 0.222                | Met            | 1.066 (0.956, 1.187)        | 0.249             | 0.295                |
| C7-DC             | 0.909 (0.809, 1.022)        | 0.109             | 0.174                | Orn            | <b>1.292 (1.168, 1.430)</b> | <b>&lt; 0.001</b> | <b>&lt; 0.001</b>    |
| C8                | <b>0.861 (0.759, 0.978)</b> | <b>0.021</b>      | <b>0.041</b>         | Phe            | <b>1.307 (1.182, 1.446)</b> | <b>&lt; 0.001</b> | <b>&lt; 0.001</b>    |
| C8:1              | <b>1.193 (1.086, 1.312)</b> | <b>&lt; 0.001</b> | <b>&lt; 0.001</b>    | Pro            | <b>1.215 (1.095, 1.349)</b> | <b>&lt; 0.001</b> | <b>&lt; 0.001</b>    |
| C8-DC             | 0.921 (0.819, 1.036)        | 0.172             | 0.222                | Ser            | <b>0.785 (0.697, 0.884)</b> | <b>&lt; 0.001</b> | <b>&lt; 0.001</b>    |
| C8-OH/C6-DC       | 0.966 (0.863, 1.081)        | 0.547             | 0.586                | Tyr            | <b>1.404 (1.272, 1.550)</b> | <b>&lt; 0.001</b> | <b>&lt; 0.001</b>    |
| C10               | <b>0.852 (0.749, 0.971)</b> | <b>0.016</b>      | <b>0.036</b>         | Val            | <b>1.353 (1.222, 1.499)</b> | <b>&lt; 0.001</b> | <b>&lt; 0.001</b>    |
| C10:1             | 0.893 (0.792, 1.007)        | 0.065             | 0.111                | Aromatic       | <b>1.240 (1.121, 1.372)</b> | <b>&lt; 0.001</b> | <b>&lt; 0.001</b>    |
| C10:2             | 1.019 (0.913, 1.137)        | 0.735             | 0.735                | Branched-chain | <b>1.373 (1.240, 1.520)</b> | <b>&lt; 0.001</b> | <b>&lt; 0.001</b>    |
| C10:3             | <b>1.184 (1.077, 1.301)</b> | <b>&lt; 0.001</b> | <b>&lt; 0.001</b>    | Fischer ratio  | 1.078 (0.831, 1.036)        | 0.184             | 0.227                |
| C12               | 0.967 (0.863, 1.082)        | 0.556             | 0.586                | <b>Ala:Gly</b> | <b>1.578 (1.436, 1.735)</b> | <b>&lt; 0.001</b> | <b>&lt; 0.001</b>    |
| C12:1             | 0.959 (0.855, 1.075)        | 0.469             | 0.523                |                |                             |                   |                      |
| C14               | 1.087 (0.981, 1.205)        | 0.113             | 0.174                |                |                             |                   |                      |
| C14:1             | 1.021 (0.915, 1.139)        | 0.708             | 0.720                |                |                             |                   |                      |
| C14:1-OH          | 1.082 (0.973, 1.205)        | 0.147             | 0.208                |                |                             |                   |                      |
| C14:2             | 0.960 (0.857, 1.076)        | 0.485             | 0.531                |                |                             |                   |                      |
| C14-OH/C12-DC     | <b>1.150 (1.034, 1.277)</b> | <b>0.010</b>      | <b>0.028</b>         |                |                             |                   |                      |
| C16               | <b>1.189 (1.074, 1.316)</b> | <b>0.001</b>      | <b>0.003</b>         |                |                             |                   |                      |
| C16:1             | 1.083 (0.975, 1.203)        | 0.139             | 0.202                |                |                             |                   |                      |
| C16:1-OH/C14:1-DC | <b>1.130 (1.021, 1.252)</b> | <b>0.019</b>      | <b>0.038</b>         |                |                             |                   |                      |
| C16:2             | 1.080 (0.971, 1.201)        | 0.157             | 0.217                |                |                             |                   |                      |
| C16-OH            | <b>1.326 (1.203, 1.462)</b> | <b>&lt; 0.001</b> | <b>&lt; 0.001</b>    |                |                             |                   |                      |
| C18               | 1.026 (0.921, 1.142)        | 0.642             | 0.665                |                |                             |                   |                      |
| C18:1             | 1.086 (0.977, 1.207)        | 0.127             | 0.189                |                |                             |                   |                      |
| C18:1-DC          | <b>1.143 (1.032, 1.267)</b> | <b>0.011</b>      | <b>0.029</b>         |                |                             |                   |                      |
| C18:2             | 1.091 (0.979, 1.216)        | 0.114             | 0.174                |                |                             |                   |                      |
| C18:2-OH          | 1.072 (0.963, 1.193)        | 0.203             | 0.245                |                |                             |                   |                      |
| C18-DC/C20-OH     | <b>1.140 (1.028, 1.264)</b> | <b>0.013</b>      | <b>0.030</b>         |                |                             |                   |                      |

---

|              |                             |              |              |
|--------------|-----------------------------|--------------|--------------|
| C20          | 0.956 (0.853, 1.072)        | 0.442        | 0.503        |
| C20:4        | <b>1.139 (1.027, 1.263)</b> | <b>0.013</b> | <b>0.030</b> |
| Short chain  | <b>1.145 (1.030, 1.271)</b> | <b>0.012</b> | <b>0.030</b> |
| Medium chain | 0.935 (0.831, 1.051)        | 0.258        | 0.299        |
| Long chain   | <b>1.128 (1.016, 1.253)</b> | <b>0.024</b> | <b>0.044</b> |

<sup>1</sup> As metabolite data were converted to Z-scores, HR are measured in per SD.

<sup>2</sup> Adjusted for multiple testing using the Benjamini-Hochberg false discovery rate.

**Supplementary Table 5** Associations between metabolites and incident diabetes in study participants of Chinese ethnicity, adjusted for age, sex, height, and parental history of diabetes. Significant associations following multiple testing are in bold.

| Acylcarnitines    | HR <sup>1</sup> (95% CI)    | P-value      | P-value <sup>2</sup> | Amino acids           | HR (95% CI)                 | P-value           | P-value <sup>2</sup> |
|-------------------|-----------------------------|--------------|----------------------|-----------------------|-----------------------------|-------------------|----------------------|
| C2                | 1.037 (0.907, 1.185)        | 0.594        | 0.716                | <b>Ala</b>            | <b>1.370 (1.201, 1.562)</b> | <b>&lt; 0.001</b> | <b>&lt; 0.001</b>    |
| C3                | 1.066 (0.933, 1.218)        | 0.349        | 0.506                | Arg                   | 0.871 (0.752, 1.010)        | 0.067             | 0.144                |
| C4                | 1.153 (1.022, 1.301)        | 0.021        | 0.067                | Cit                   | 0.964 (0.836, 1.111)        | 0.609             | 0.716                |
| C4-DC             | 1.162 (1.021, 1.323)        | 0.023        | 0.067                | <b>Glu/Gln</b>        | <b>1.498 (1.327, 1.690)</b> | <b>&lt; 0.001</b> | <b>&lt; 0.001</b>    |
| C5:1              | 1.058 (0.926, 1.210)        | 0.406        | 0.574                | <b>Gly</b>            | <b>0.670 (0.563, 0.797)</b> | <b>&lt; 0.001</b> | <b>&lt; 0.001</b>    |
| C5-DC             | 1.077 (0.951, 1.220)        | 0.244        | 0.363                | His                   | 0.956 (0.829, 1.102)        | 0.534             | 0.681                |
| C5-OH/C3-DC       | 1.008 (0.883, 1.151)        | 0.904        | 0.971                | <b>Ile/Leu</b>        | <b>1.538 (1.342, 1.763)</b> | <b>&lt; 0.001</b> | <b>&lt; 0.001</b>    |
| C6                | 0.998 (0.878, 1.136)        | 0.981        | 0.998                | Met                   | 1.147 (0.996, 1.322)        | 0.057             | 0.132                |
| C7-DC             | 0.854 (0.738, 0.989)        | 0.035        | 0.092                | <b>Orn</b>            | <b>1.239 (1.092, 1.406)</b> | <b>0.001</b>      | 0.006                |
| C8                | 0.843 (0.722, 0.984)        | 0.031        | 0.086                | <b>Phe</b>            | <b>1.275 (1.121, 1.452)</b> | <b>&lt; 0.001</b> | <b>&lt; 0.001</b>    |
| <b>C8:1</b>       | <b>1.208 (1.072, 1.361)</b> | <b>0.002</b> | <b>0.011</b>         | Pro                   | 1.138 (0.992, 1.306)        | 0.065             | 0.144                |
| C8-DC             | 0.882 (0.762, 1.021)        | 0.093        | 0.163                | Ser                   | 0.839 (0.722, 0.974)        | 0.021             | 0.067                |
| C8-OH/C6-DC       | 0.873 (0.752, 1.012)        | 0.072        | 0.149                | <b>Tyr</b>            | <b>1.290 (1.130, 1.473)</b> | <b>&lt; 0.001</b> | <b>&lt; 0.001</b>    |
| C10               | 0.835 (0.716, 0.974)        | 0.022        | 0.067                | <b>Val</b>            | <b>1.481 (1.296, 1.692)</b> | <b>&lt; 0.001</b> | <b>&lt; 0.001</b>    |
| C10:1             | 0.879 (0.759, 1.019)        | 0.087        | 0.158                | <b>Aromatic</b>       | <b>1.191 (1.045, 1.358)</b> | <b>0.009</b>      | <b>0.044</b>         |
| C10:2             | 0.999 (0.872, 1.144)        | 0.983        | 0.998                | <b>Branched-chain</b> | <b>1.527 (1.334, 1.747)</b> | <b>&lt; 0.001</b> | <b>&lt; 0.001</b>    |
| C10:3             | 1.156 (1.020, 1.310)        | 0.023        | 0.067                | Fischer ratio         | 1.111 (0.964, 1.280)        | 0.145             | 0.247                |
| C12               | 0.874 (0.754, 1.014)        | 0.076        | 0.151                | <b>Ala:Gly</b>        | <b>1.576 (1.404, 1.768)</b> | <b>&lt; 0.001</b> | <b>&lt; 0.001</b>    |
| C12:1             | 0.838 (0.725, 0.970)        | 0.018        | 0.067                |                       |                             |                   |                      |
| C14               | 0.953 (0.826, 1.098)        | 0.505        | 0.681                |                       |                             |                   |                      |
| C14:1             | 0.880 (0.763, 1.014)        | 0.078        | 0.151                |                       |                             |                   |                      |
| C14:1-OH          | 0.920 (0.801, 1.058)        | 0.242        | 0.363                |                       |                             |                   |                      |
| C14:2             | 0.846 (0.732, 0.977)        | 0.023        | 0.067                |                       |                             |                   |                      |
| C14-OH/C12-DC     | 1.000 (0.874, 1.144)        | 0.998        | 0.998                |                       |                             |                   |                      |
| C16               | 1.088 (0.948, 1.249)        | 0.228        | 0.363                |                       |                             |                   |                      |
| C16:1             | 0.922 (0.804, 1.056)        | 0.242        | 0.363                |                       |                             |                   |                      |
| C16:1-OH/C14:1-DC | 0.974 (0.849, 1.117)        | 0.705        | 0.802                |                       |                             |                   |                      |
| C16:2             | 0.884 (0.768, 1.017)        | 0.084        | 0.157                |                       |                             |                   |                      |
| C16-OH            | 1.135 (0.997, 1.292)        | 0.055        | 0.132                |                       |                             |                   |                      |
| C18               | 0.964 (0.836, 1.112)        | 0.617        | 0.716                |                       |                             |                   |                      |
| C18:1             | 0.965 (0.843, 1.105)        | 0.605        | 0.716                |                       |                             |                   |                      |
| C18:1-DC          | 0.993 (0.865, 1.140)        | 0.923        | 0.973                |                       |                             |                   |                      |
| C18:2             | 0.982 (0.857, 1.124)        | 0.788        | 0.862                |                       |                             |                   |                      |
| C18:2-OH          | 0.958 (0.838, 1.096)        | 0.532        | 0.681                |                       |                             |                   |                      |

---

|               |                      |       |       |
|---------------|----------------------|-------|-------|
| C18-DC/C20-OH | 0.915 (0.793, 1.056) | 0.224 | 0.363 |
| C20           | 0.842 (0.726, 0.976) | 0.022 | 0.067 |
| C20:4         | 1.046 (0.916, 1.195) | 0.505 | 0.681 |
| Short chain   | 1.043 (0.912, 1.191) | 0.540 | 0.681 |
| Medium chain  | 0.862 (0.746, 0.997) | 0.046 | 0.116 |
| Long chain    | 0.981 (0.855, 1.124) | 0.777 | 0.862 |

<sup>1</sup> As metabolite data were converted to Z-scores, HR are measured in per SD.

<sup>2</sup> Adjusted for multiple testing using the Benjamini-Hochberg false discovery rate.

**Supplementary Figure 1** Heatmap of the pairwise correlations between the 13 potential biomarkers.

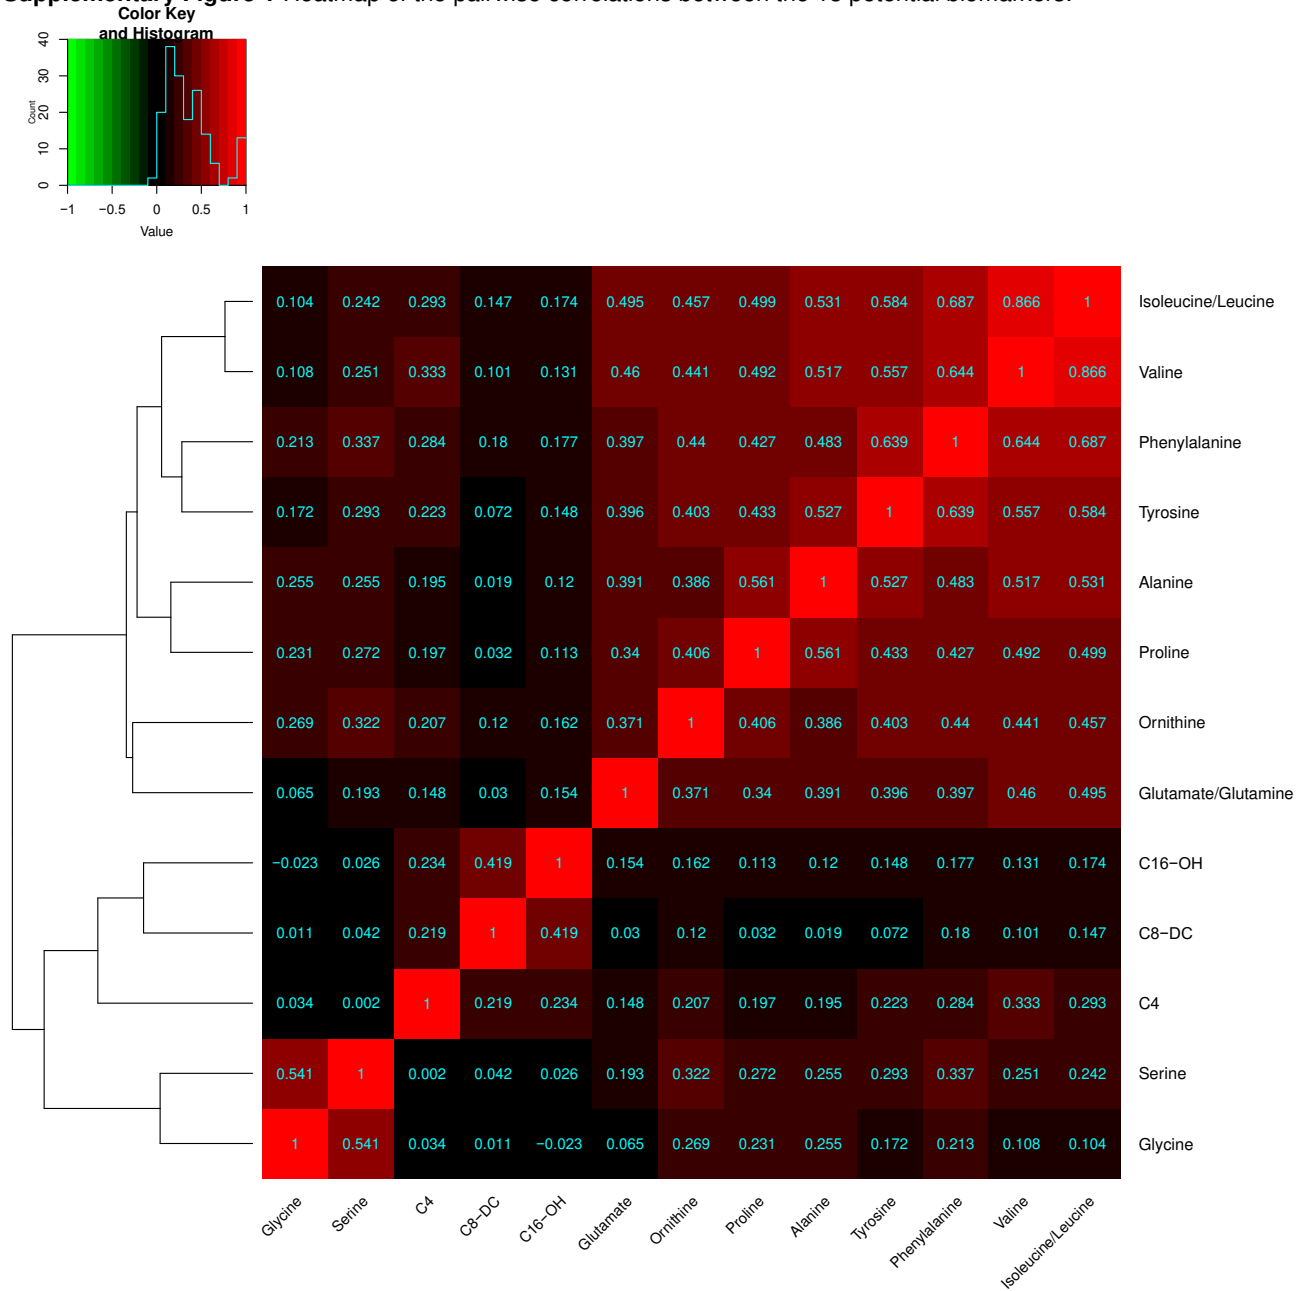

Supplement: bmjdrc-2020-001315supp001.pdf [file bmjdrc-2020-001315supp001.pdf]
